# Supplementary material
Source: Springer Nature journal article supplement (https://www.springermedizin.de/resource/supplementary/12943_2014_1285_MOESM6_ESM.pdf/9553146)
Supplement: MOESM6 [file 9553146]

Additional file 6

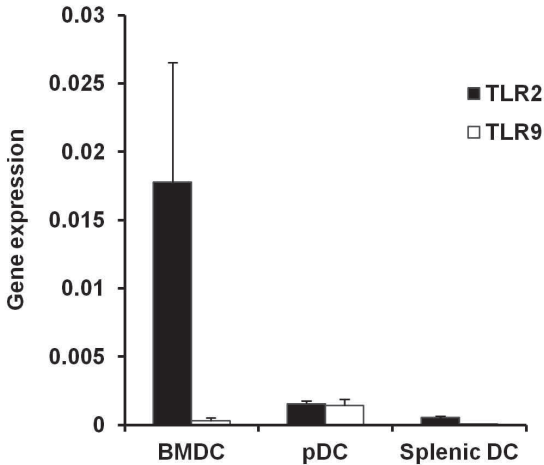

**Figure S6: Expression of TLR2 and TLR in dendritic cell subsets.** Total RNA of BMDCs, pDCs or splenic DCs were extracted using the total RNA isolation kit. The obtained cDNA was diluted 1/25 with water and 10  $\mu$ L were used for amplification. The PCR was performed with the SYBRR Green PCR Master Mix. Gene expression of TLR 2 and TLR 9 was determined by quantitative real-time RT-PCR and normalized to GAPDH.
